# Supplementary material for: Performance evaluation of Ru–Pt alloy nanoparticle catalysts for hydroxylammonium nitrate (HAN)-based propellants
Source: Royal Society of Chemistry journal article supplement (doi:10.1039/d5nj00205b), 2025-01-01
Supplement: d5nj00205b1.pdf [file d5nj00205b1.pdf]

## Supplementary Information

# **Performance Evaluation of Ru-Pt Alloy Nanoparticles Catalyst for Hydroxylammonium nitrate (HAN) Based Propellant**

Xiushuang Zhou, Yu Shen, Xubo Li, Yongmin Huang\*

School of Chemistry and Molecular Engineering, East China University of Science and Technology, Shanghai 200237, P.R.China;

\*Corresponding E-mail: [huangym@ecust.edu.cn](mailto:huangym@ecust.edu.cn)

**Table S1.** Pore structure parameters of catalyst samples.

| catalyst                       | $S_{\text{BET}}$ ( $\text{m}^2/\text{g}$ ) | Pore diameter (nm) | Total pore volume ( $\text{cm}^3/\text{g}$ ) |
|--------------------------------|--------------------------------------------|--------------------|----------------------------------------------|
| Ru/ $\text{Al}_2\text{O}_3$    | 157.65                                     | 3.96               | 0.20                                         |
| Ru-Pt/ $\text{Al}_2\text{O}_3$ | 128.01                                     | 3.85               | 0.17                                         |

The infrared absorption experiment of the samples was performed on a Thermo Scientific Nicolet iS20 Fourier Transform Infrared (FTIR) Spectrometer with a scanning range of 400–4000  $\text{cm}^{-1}$ , and the gaseous products were introduced into the infrared gas cell.

The infrared spectroscopic data (Fig. S1) reveal the presence of methanol, as evidenced by the C–O stretching vibration band ( $\nu(\text{C–O})$ ) at 1030  $\text{cm}^{-1}$  and the symmetric/antisymmetric stretching vibrations of  $\text{CH}_3$  ( $\nu_s/\nu_{as}(\text{CH}_3)$ ) within the 2850–3000  $\text{cm}^{-1}$  region. The sharp N=O stretching vibration peak ( $\nu(\text{N=O})$ ) at 1800  $\text{cm}^{-1}$  validates the presence of NO molecules, while the sharp O–N–O asymmetric stretching vibration peak ( $\nu_3(\text{N–O})$ ) at 1620  $\text{cm}^{-1}$  confirms  $\text{NO}_2$  formation. Additionally, the observation of an in-plane bending vibration ( $\delta(\text{N–N–O})$ ) at 580  $\text{cm}^{-1}$  and an asymmetric stretching vibration ( $\nu_3(\text{N–N–O})$ ) spanning 2000–2300  $\text{cm}^{-1}$  is correlated with the generation of  $\text{N}_2\text{O}$  species.

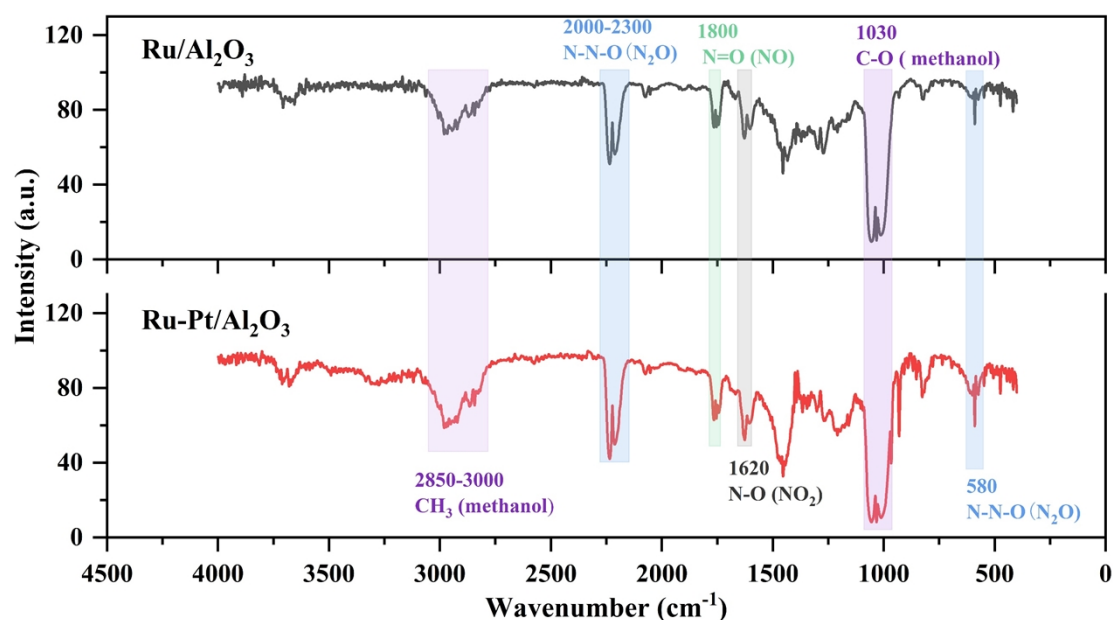

Fig. S1. IR spectrum of decomposition products of HAN based propellant.

The gas chromatography mass spectrometer was carried out on GC1290 gas chromatography and MSQ8100 mass spectrometer of SUNNY HENGPING instrument. The instrumental parameters were set as follows: inlet temperature at 100°C, column oven temperature at 80°C, auxiliary temperature at 90°C, and ion source temperature at 230°C.

The propellant decomposition over Ru/Al<sub>2</sub>O<sub>3</sub> and Ru-Pt/Al<sub>2</sub>O<sub>3</sub> catalysts predominantly generated nitrogen (N<sub>2</sub>), carbon dioxide (CO<sub>2</sub>), and nitrous oxide (N<sub>2</sub>O) as dominant gaseous products as shown in Fig. S2 in the gas chromatographic (GC) analysis. The gaseous products contained a major fraction of N<sub>2</sub>, which was assigned a reference value of 1. Subsequently, the relative molar ratios of CO<sub>2</sub> and N<sub>2</sub>O to N<sub>2</sub> were quantitatively calculated. Fig. S3 displays the electron ionization mass spectrum (EI-MS) corresponding to the target chromatographic peak resolved in GC chromatogram, enabling structural elucidation of the eluted compound.

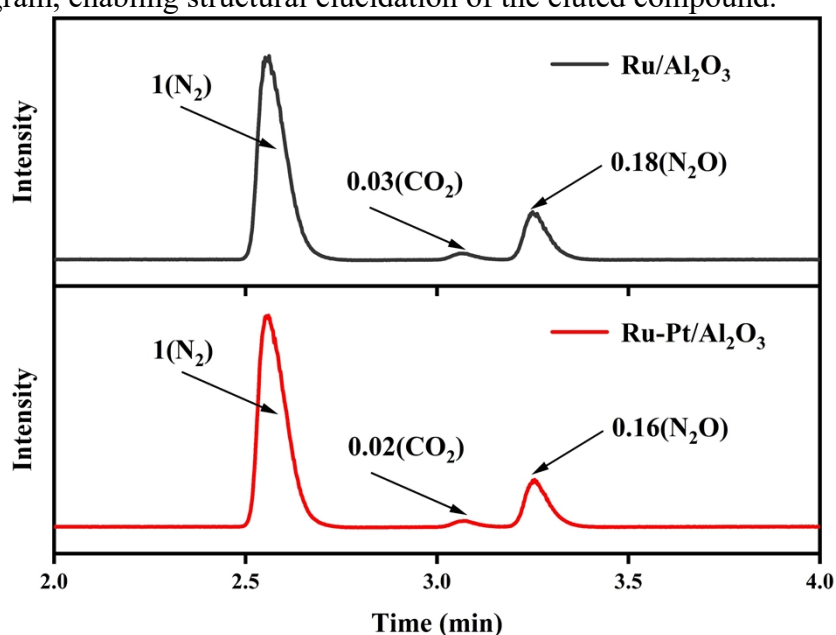

Fig. S2. GC chromatogram of decomposition products of HAN based propellant.

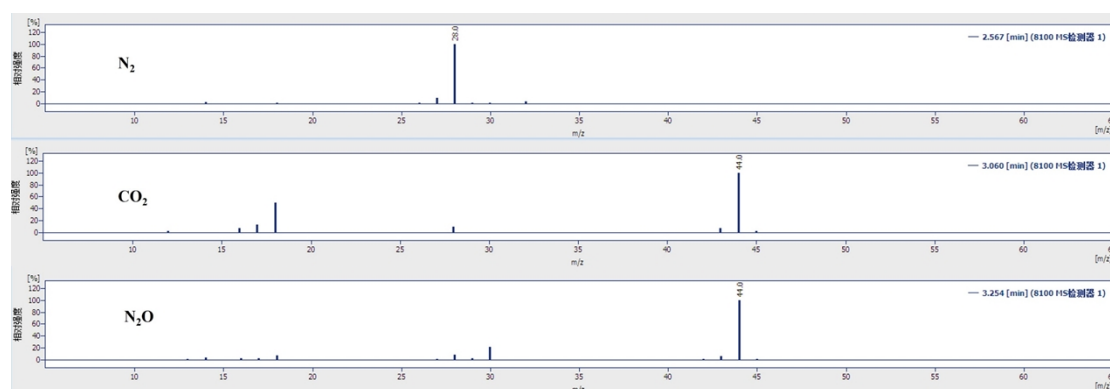

Fig. S3. The mass spectrum of the corresponding peak in GC chromatogram.

**Table S2.** Hot firing test conditions.

|                                |                                                                     |
|--------------------------------|---------------------------------------------------------------------|
| Propellant                     | HAN                                                                 |
| Propellant Feed Pressure [MPa] | 1.0, 1.2, 1.6, 1.8                                                  |
| Firing Mode                    | Continuous:10 s, 100 s<br>Pulse:0.05 s ON/1 s OFF, 0.1 s ON/1 s OFF |
| Catalyst Preheat Temp. [°C]    | 120                                                                 |

**Table S3.** Test matrix of the experimental campaign.

| Sequence | Type of Experiment | Cold/Hot Start-up | Feeding Pressure (MPa) | Time (s) | number |
|----------|--------------------|-------------------|------------------------|----------|--------|
| 1        | Pulse Mode         | Hot               | 1.0                    | 0.05/1   | 10     |
| 2        | Continuous         | Hot               | 1.2                    | 10       | 1      |
| 3        | Continuous         | Hot               | 1.6                    | 10       | 1      |
| 4        | Pulse Mode         | Hot               | 1.6                    | 0.1/1    | 10     |
| 5        | Continuous         | Hot               | 1.8                    | 10       | 1      |
| 6        | Pulse Mode         | Hot               | 1.8                    | 0.1/1    | 10     |
| 7        | Continuous         | Hot               | 1.0                    | 10       | 1      |
| 8        | Pulse Mode         | Hot               | 1.0                    | 0.1/1    | 10     |
| 9        | Continuous         | Hot               | 1.6                    | 100      | 1      |

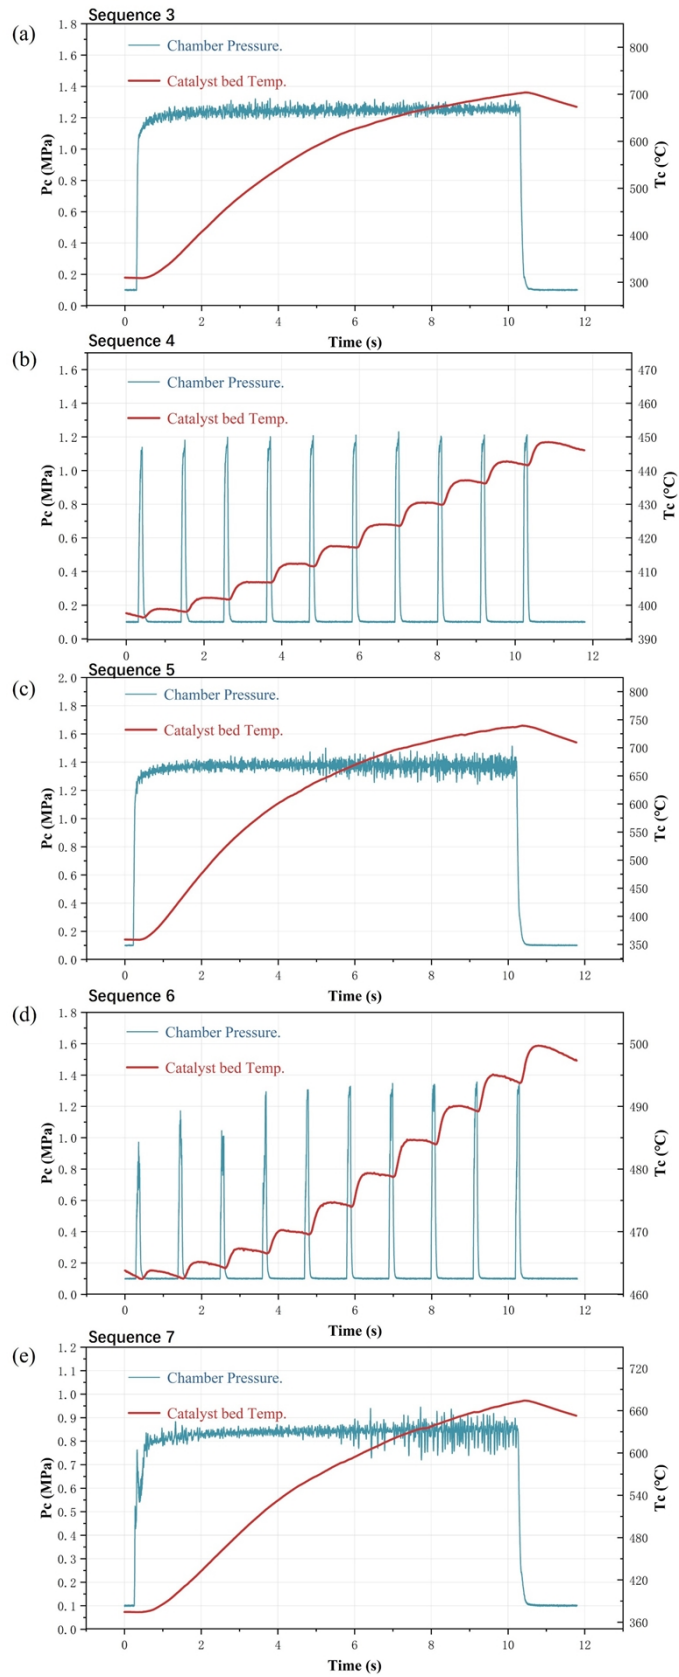

**Fig. S4.** Typical combustion pressure and catalyst bed temperature profile of (a) Sequence 3, (b) Sequence 4, (c) Sequence 5, (d) Sequence 6 and (e) Sequence 7.

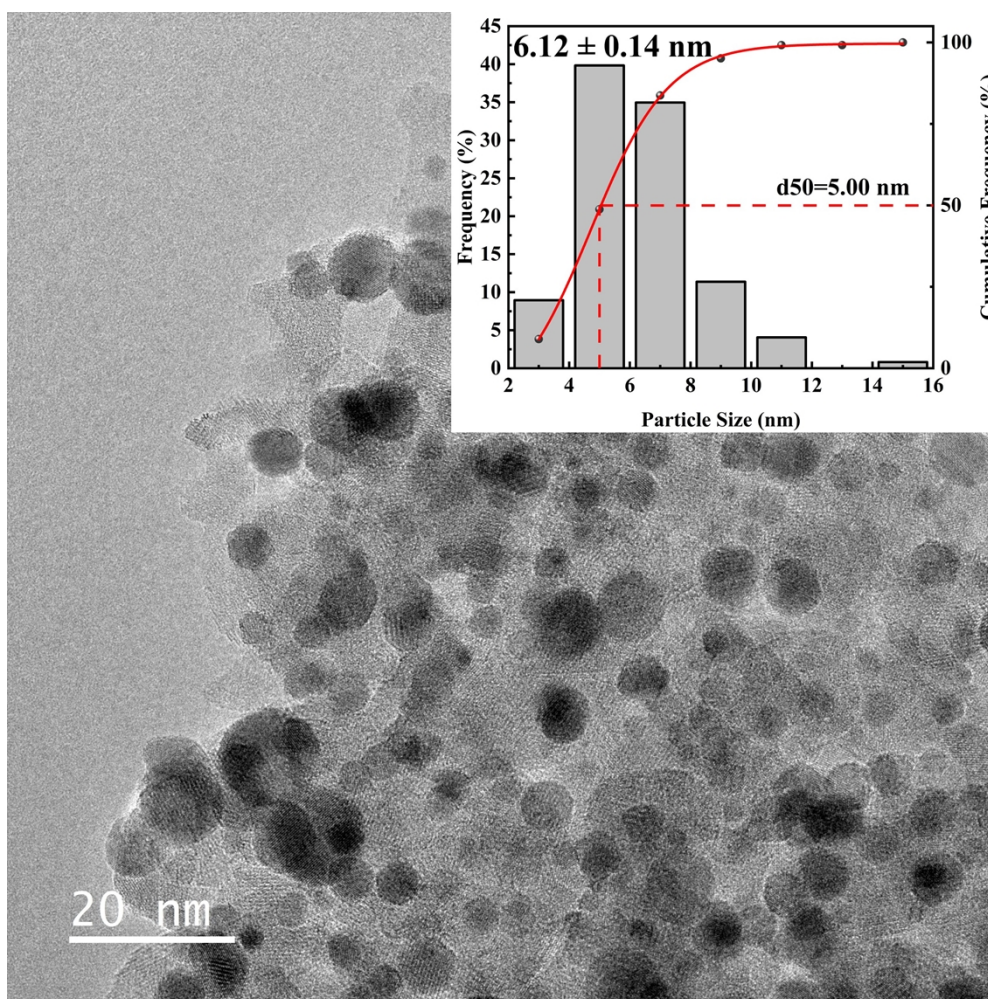

**Fig. S5.** TEM image and the size distribution of the used Ru-Pt/Al<sub>2</sub>O<sub>3</sub>.

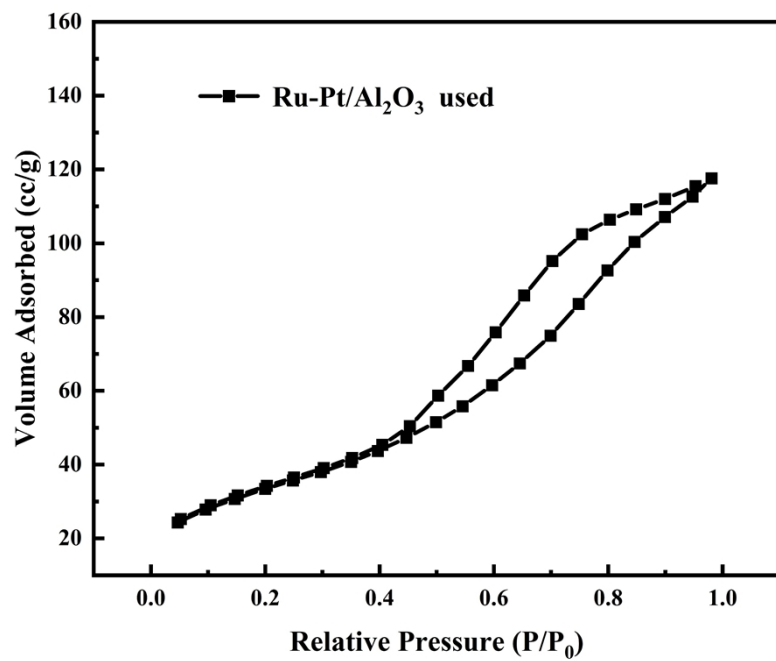

Fig. S6.  $N_2$  adsorption-desorption isotherm of the used  $Ru-Pt/Al_2O_3$ .
